# Supplementary figures and images for: StyletChip: a microfluidic device for recording host invasion behaviour and feeding of plant parasitic nematodes
Source: Royal Society of Chemistry journal article supplement (doi:10.1039/c4lc00292j), 2014-01-01

ESI 1

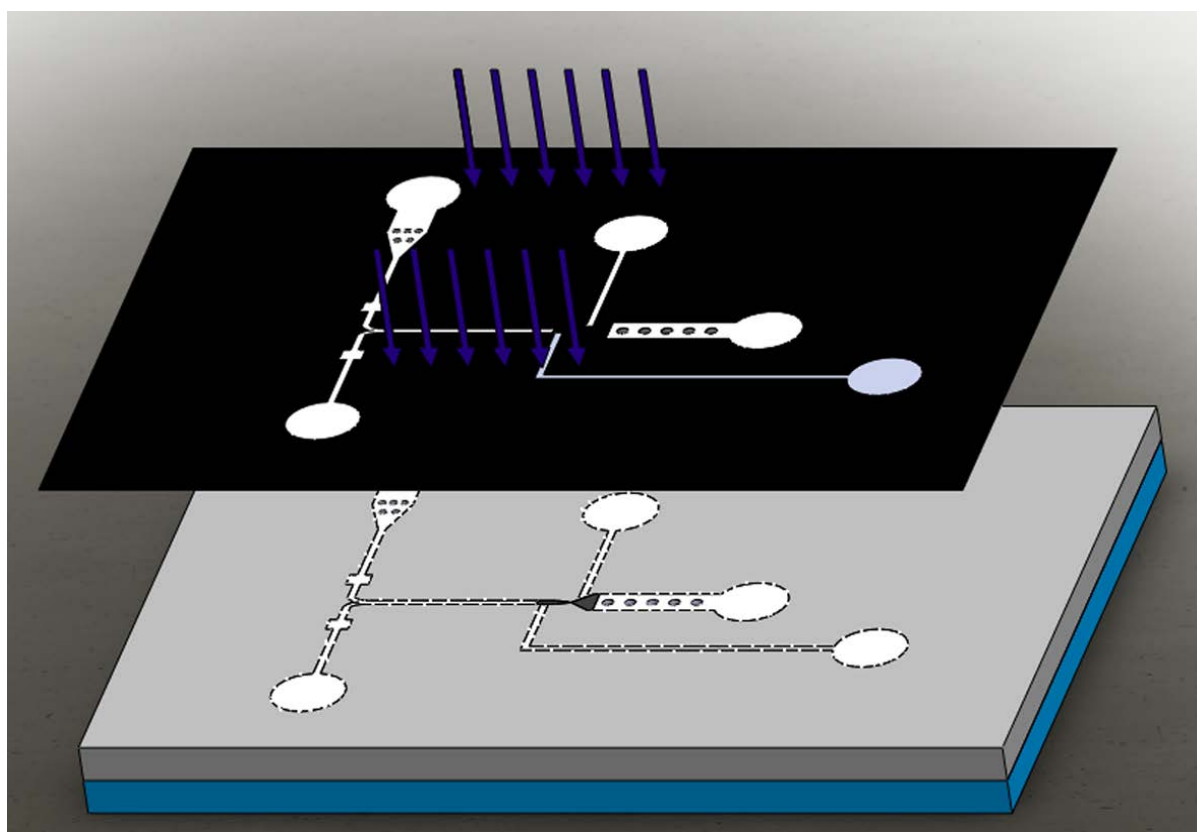

ESI 2

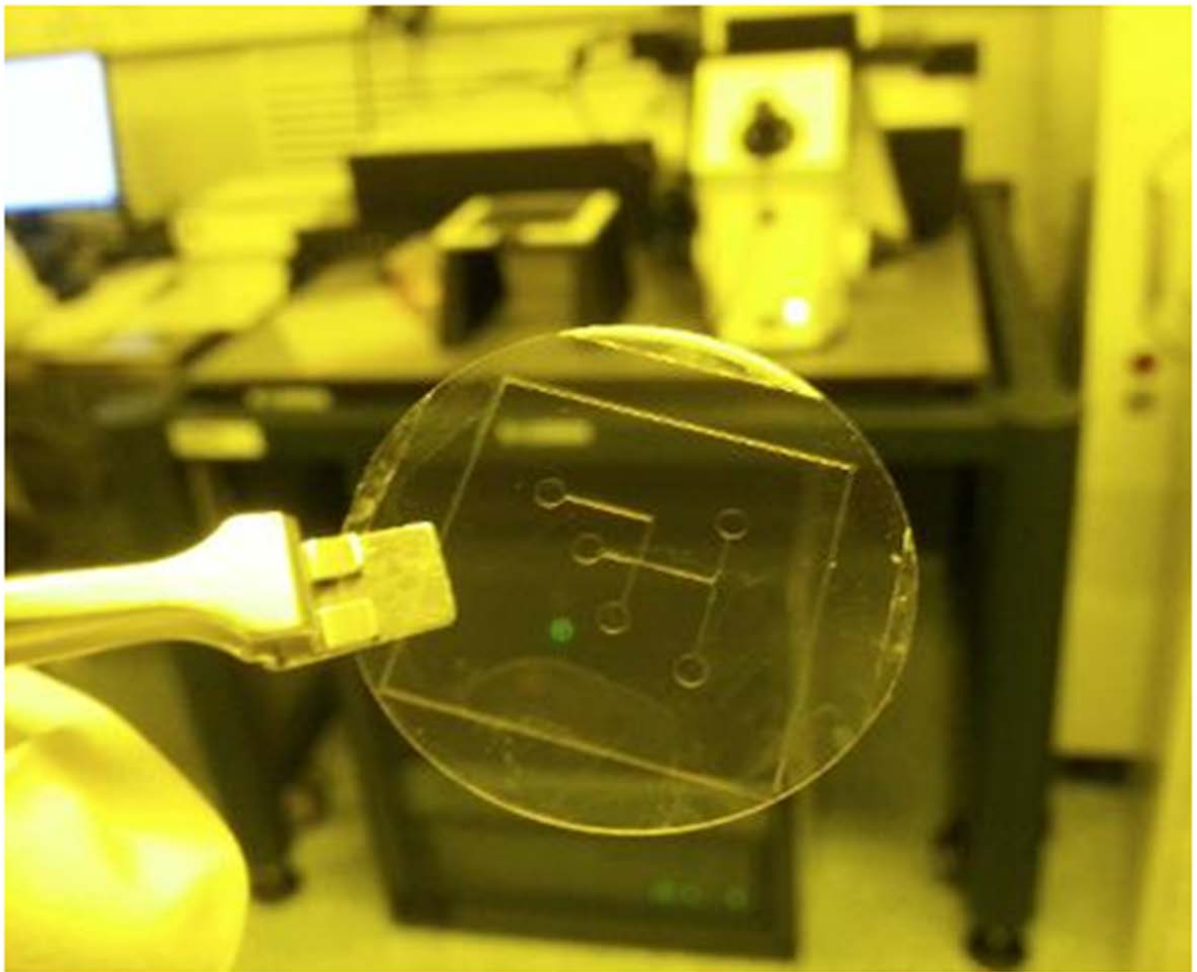

Supplement: c4lc00292j1.pdf [file c4lc00292j1.pdf]
